# Supplementary material for: The relationship between parental health literacy levels and anthropometric measurements of children in Turkey
Source: Springer Nature journal article supplement (doi:10.1186/s12887-023-04385-4), 2023-11-10
Supplement: MOESM1 [file 26290894]

**emine mizyal**

Kuyu Sok. No. 7, Rumelihisari  
Istanbul, Turkey  
Home Office: 90-212-263-6296  
Mobile: 90-532-500-1724  
E-mail: emizyal@gmail.com  
Citizenship ID. 59587409478

**TRANSLATION & INTERPRETATION  
SERVICES**

August 19, 2022

I provide this document to confirm and certify that I, Emine Mizyal Adsiz, a native speaker of English and an independent translator, translated the manuscript with the English title

**“The Relationship between Parental Health Literacy Levels and Children's Health  
Outcomes in a Family Health Center in Turkey”**

from its original Turkish. Please note that I do not bear responsibility for revisions made to the document after my translation.

Emine Mizyal Adsiz

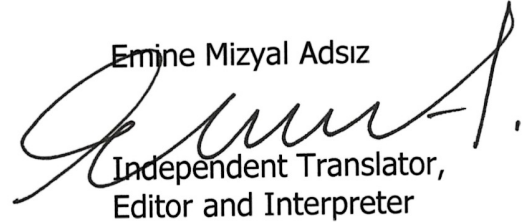

Independent Translator,  
Editor and Interpreter
