# Supplementary material for: The relationship between parental health literacy levels and anthropometric measurements of children in Turkey
Source: Springer Nature journal article supplement (doi:10.1186/s12887-023-04385-4), 2023-11-10

MUĞLA SITKI KOÇMAN ÜNİVERSİTESİ  
SAĞLIK BİLİMLERİ ETİK KURUL KARARI

Protokol No : 210042

Karar No : 83

|                                                            |                                                                                                                             |
|------------------------------------------------------------|-----------------------------------------------------------------------------------------------------------------------------|
| <b>Araştırma Yürütücüsü</b>                                | Yüksek Lisans Öğrencisi MİNE TOPÇU                                                                                          |
| <b>Kurumu / Birimi</b>                                     | MUĞLA SITKI KOÇMAN ÜNİVERSİTESİ / HALK SAĞLIĞI<br>HEMŞİRELİĞİ                                                               |
| <b>Araştırmanın Başlığı</b>                                | Ebeveynlerin Sağlık Okuryazarlık Düzeyi İle Çocukların Büyüme Ve<br>Gelişimleri Arasındaki İlişki                           |
| <b>Başvuru Formunun Etik Kurula<br/>Geldiği Tarih</b>      | 03.02.2021                                                                                                                  |
| <b>Başvuru Formunun Etik Kurulda<br/>İncelendiği Tarih</b> | İlk İnceleme Tarihi : <b>27.02.2021</b><br>1. Düzeltme Tarihi : <b>14.03.2021</b><br>2. Düzeltme Tarihi : <b>09.04.2021</b> |
| <b>Karar Tarihi</b>                                        | <b>26.04.2021</b>                                                                                                           |

**KARAR : UYGUNDUR**

AÇIKLAMA :Beyan edilen veri formlarının dışına çıkılmaması şartıyla araştırmanın uygulanabilirliği konusunda bilimsel araştırmalar etiği açısından bir sakınca yoktur.

Prof.Dr. Haşim OLGUN  
Başkan

Prof.Dr. Kılıçhan BAYAR  
Üye

Prof.Dr. Nevin AKDOLUN BALKAYA  
Üye

Prof.Dr. Özcan SAYGIN  
Üye

Doç.Dr. Ahmet Salih SÖNMEZDAĞ  
Üye

Doç.Dr. Cem ŞAHİN  
Üye

Prof.Dr. Süleyman Cüneyt KARAKUŞ  
Üye

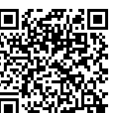

Supplement: MOESM2 [file 26290894]
